# Supplementary material for: A chimeric viral platform for directed evolution in mammalian cells
Source: Springer Nature journal article supplement (doi:10.1038/s41467-025-59438-2), 2025-05-07
Supplement: MOESM13 [file 41467_2025_59438_MOESM13_ESM.pdf]

## **Legends for Supplementary Data and Supplementary Movies**

**Supplementary Data 1. eGFP-LUC variants.** All substitutions in transgene RNA detected at  $\geq 0.3\%$  over three rounds of VLV propagation.

**Supplementary Data 2. tTA variants.** Non-synonymous substitutions in transgene RNA detected at  $\geq 1\%$  during two PROTEUS campaigns.

**Supplementary Data 3. Analysis of tTA and rtTA-3G mutants.** Half maximal inhibitory/effective concentrations (IC<sub>50</sub>/EC<sub>50</sub>) and 95% confidence intervals (95% CI) for tTA and rtTA-3G figures.

**Supplementary Data 4. rtTA-3G variants.** Non-synonymous substitutions in transgene RNA detected at  $\geq 1\%$  of the population during a PROTEUS campaign.

**Supplementary Data 5. Nb139 variants.** Non-synonymous substitutions in transgene RNA detected at  $\geq 1\%$  during a PROTEUS campaign.

**Supplementary Data 6. List of plasmids used or generated in this study.**

**Supplementary Data 7. List of PROTEUS oligos.**

**Supplementary Movie 1. Videos for stills of turboGFP timelapse in Fig. 4G and Extended Data Fig. 8.** turboGFP control in green. Nuclei labeled with mCherry (red).

**Supplementary Movie 2. Videos for stills of Nb139-eGFP timelapse in Fig. 4G and Extended Data Fig. 8.** Nb139-eGFP biosensor in green. Nuclei labeled with mCherry (red).

**Supplementary Movie 3. Videos for stills of Nb139[S26P]-eGFP timelapse in Fig. 4G and Extended Data Fig. 8.** Nb139[S26P]-eGFP biosensor in green. Nuclei labeled with mCherry (red).
